# Supplementary material for: Involvement of gonadotropin-inhibitory hormone in pubertal disorders induced by thyroid status
Source: PubMed Central journal article supplement (PMC5430760; doi:10.1038/s41598-017-01183-8), 2017-04-21
Supplement: 41598_2017_1183_MOESM1_ESM.pdf [file 41598_2017_1183_MOESM1_ESM.pdf]

## Supplementary Materials

### **Involvement of gonadotropin-inhibitory hormone in pubertal disorders induced by thyroid status**

Mika Kiyohara<sup>1,2,†</sup>, You Lee Son<sup>1,†,\*</sup>, Kazuyoshi Tsutsui<sup>1,\*</sup>

<sup>1</sup>Laboratory of Integrative Brain Sciences, Department of Biology, Waseda University, and Center for Medical Life Science of Waseda University, Shinjuku-ku, Tokyo 162-8480, Japan.

<sup>2</sup>Department of Pediatrics, The Jikei University School of Medicine, Minato-ku, Tokyo 105-8461, Japan.

\*Correspondence should be addressed to Y.L.S. ([iac15016@kurenai.waseda.jp](mailto:iac15016@kurenai.waseda.jp), [youleeson@gmail.com](mailto:youleeson@gmail.com)) or K.T. ([k-tsutsui@waseda.jp](mailto:k-tsutsui@waseda.jp))

†These authors contributed equally to this work.

## Supplementary Figure 1

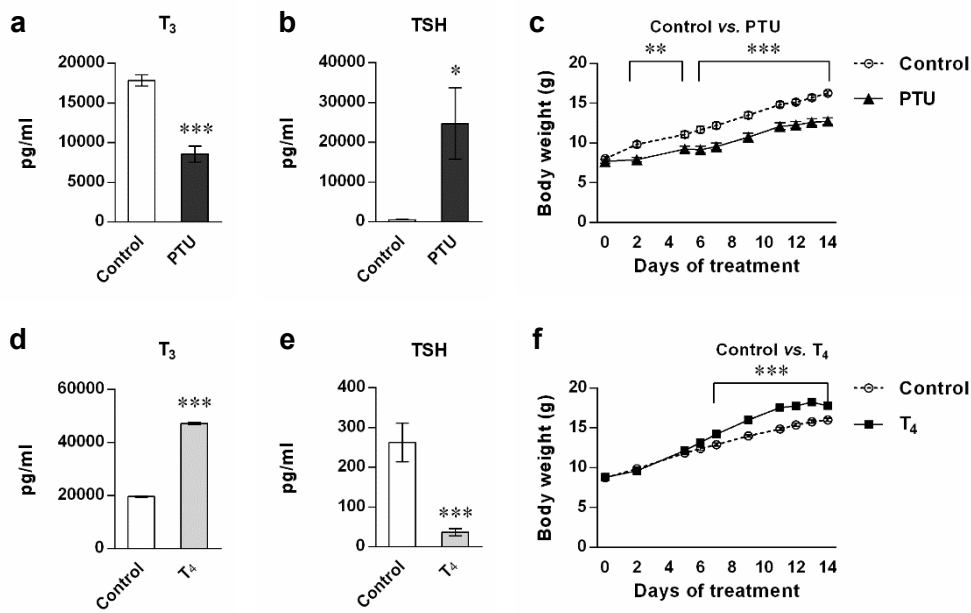

**Supplementary Figure 1. Successful induction of hypothyroidism and hyperthyroidism in mice.** Hypothyroidism (PTU group, Upper panel) or hyperthyroidism ( $T_4$  group, Lower panel) was confirmed in hormonal levels of  $T_3$  (A or D), TSH (B or E) and body weight (C or F). 0.1% PTU or 0.001%  $T_4$  was administered to immature female mice aged 20 days in drinking water for 2 weeks, respectively. Data represent mean  $\pm$  SEM (A and B, n = 7 per group; C and F, n = 10 per group, D and E, n = 6 in control and n = 7 in  $T_4$  group). \* $p$  < 0.05; \*\* $p$  < 0.01; \*\*\* $p$  < 0.001 by unpaired  $t$  test.

## Supplementary Figure 2

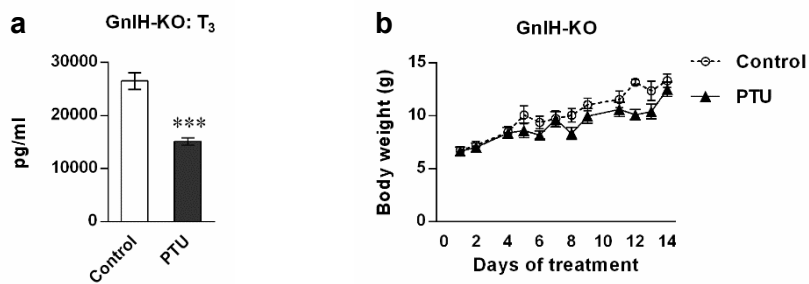

**Supplementary Figure 2. Induction of hypothyroidism into GnlH-knockout female mice.** Effect of PTU administration in GnlH-KO female mice. 0.1% PTU was administered to GnlH-KO female mice aged 20 days in drinking water, then the changes in T<sub>3</sub> levels (A) and body weight (B) were measured. Data represent mean  $\pm$  SEM (B, n = 6 in WT and n = 7 in GnlH-KO group; A, n = 5 per group; B, n = 10 in control and n = 16 in PTU group). \*\*\*p < 0.001 by unpaired *t* test.

## Supplementary Table 1

| Target                         | Sequences                       | GenBank        | Used in   |
|--------------------------------|---------------------------------|----------------|-----------|
| <b>GnIH-F</b>                  | 5'-TGGAAGGACCATAGATGAGAAA-3'    | NM_021892.1    | qPCR      |
| <b>GnIH-R</b>                  | 5'-GCTGTTGTTCTCCCAAACCT-3'      |                |           |
| <b>Kiss1-F</b>                 | 5'-AGCTGCTGCTTCTCCTCTGT-3'      | NM_178260.3    | qPCR      |
| <b>Kiss1-R</b>                 | 5'-GCATACCGCGATTCTTTT-3'        |                |           |
| <b>GnRH-F</b>                  | 5'-AGCACTGGTCTATGGGTTG-3'       | NM_008145.2    | qPCR      |
| <b>GnRH-R</b>                  | 5'-CCTGGCTTCTCTTCAATCA-3'       |                |           |
| <b>GAPDH-F</b>                 | 5'-ACAACCTTGGCATTGTGGAA-3'      | NM_008084.2    | qPCR      |
| <b>GAPDH-R</b>                 | 5'-GATGCAGGGATGATGTTCTG-3'      |                |           |
| <b>TR<math>\alpha</math>-F</b> | 5'-CACTCTTCTGGAGGTCTTTGA-3'     | NM_178060.2    | ISH       |
| <b>TR<math>\alpha</math>-R</b> | 5'-TCTATATTCTCCCTTGCTTGG-3'     |                |           |
| <b>TR<math>\beta</math>-F</b>  | 5'-TCCTCAGTGATGCGCTTATG-3'      | NM_001113417.1 | ISH       |
| <b>TR<math>\beta</math>-R</b>  | 5'-TGTGCATAAGATGGGGTCAG-3'      |                |           |
| <b>- 2207F</b>                 | 5'-CTGAGTGATTCCCAAGACC-3'       | NM_021892.1    | ChIP-qPCR |
| <b>- 2207R</b>                 | 5'-TCTTGCTAGCTTGTATTATTCAGGT-3' |                |           |
| <b>- 1680F</b>                 | 5'-CTGGTGGAGCAGAAGGGTAG-3'      | NM_021892.1    | ChIP-qPCR |
| <b>- 1680R</b>                 | 5'-CGCTCTAAGCAGGTCTCTGG-3'      |                |           |
| <b>- 1257F</b>                 | 5'-TTCTTGGCTACCACAGACCA-3'      | NM_021892.1    | ChIP-qPCR |
| <b>- 1257R</b>                 | 5'-CCCTGTTCCGAAGGTGTCTA-3'      |                |           |
| <b>- 1014/999F</b>             | 5'-GTGTGGAGGTGGATGGATCT-3'      | NM_021892.1    | ChIP-qPCR |
| <b>- 1014/999R</b>             | 5'-TTTTGGAGAGGCTGACTGGT-3'      |                |           |
| <b>- 688F</b>                  | 5'-GAGCAGGAAGGTAGGACGTG-3'      | NM_021892.1    | ChIP-qPCR |
| <b>- 688R</b>                  | 5'-GCAGCCTCCTTGTATTTC-3'        |                |           |

**Supplementary Table 1.** Primers used in this study. Genomic sequence of GnIH promoter region was obtained from chromosome 6:50650672-50654439 bp of mouse genome.
